# Supplementary material for: Linking De Novo Assembly Results with Long DNA Reads Using the dnaasm-link Application
Source: Hindawi journal article supplement (doi:10.1155/2019/7847064), 2019-04-11
Supplement: f1 [file 7847064.f1.pdf]

# Linking *de novo* assembly results with long DNA reads using the dnaasm-link application

Wiktor Kuśmirek, Wiktor Franus, Robert Nowak

Supplementary Materials

# 1 Comparison with another tools

The used datasets came from Nanocorr's research (<http://schatzlab.cshl.edu/data/nanocorr>), files:

- ecoli\_Miseq\_Assembly.fa
- ecoli\_ONT\_Nanocorr\_Corrected\_reads.fa
- W303\_Miseq\_Assembly.fa
- W303\_ONT\_Nanocorr\_Corrected\_independent\_reads.fa

## 1.1 Escherichia coli

Firstly, we used SSPACE-LongRead tool:

```
cd SSPACE-LongRead_v1-1
perl SSPACE-LongRead.pl -c schatzlab_coli/input/ecoli_Miseq_Assembly.fa \
  -p schatzlab_coli/input/ecoli_ONT_Nanocorr_Corrected_reads.fa \
  -b results -k 1
mv SSPACE-LongRead_v1-1/results/scaffolds.fasta \
  schatzlab_coli/output/sspace_longreads.fa
cd bbmap
./rename.sh schatzlab_coli/output/sspace_longreads.fa \
  out=out.fa
mv -f out.fa schatzlab_coli/output/sspace_longreads.fa
```

Then, we tested LINKS application:

```
cd links_v1.8.5
echo 'schatzlab_coli/input/ecoli_ONT_Nanocorr_Corrected_reads.fa' \
  > nano_reads
perl LINKS.pl -f schatzlab_coli/input/ecoli_Miseq_Assembly.fa \
  -s nano_reads -z 1
mv schatzlab_coli/input/ecoli_Miseq_Assembly.fa.scaff*.fa \
  schatzlab_coli/output/links.fa
cd bbmap
./rename.sh schatzlab_coli/output/links.fa out=out.fa
mv -f out.fa schatzlab_coli/output/links.fa
```

After that, we generated set of short, paired DNA reads from long reads by Fast-SG:

```
cd fastsg/
echo 'long long_reads \
  schatzlab_coli/input/ecoli_ONT_Nanocorr_Corrected_reads.fa \
  4000 1' > schatzlab_coli/reads.txt
./FAST-SG.pl -k 15 -l schatzlab_coli/reads.txt \
  -r schatzlab_coli/input/ecoli_Miseq_Assembly.fa -p results
cd bbmap/
./splitsam.sh ../fastsg/long_reads.I4000.FastSG_K15.sam \
  ../fastsg/long_reads.I4000.FastSG_K15.FW.sam \
  ../fastsg/long_reads.I4000.FastSG_K15.RV.sam
```

```

cd fastsg/
samtools view -bS long_reads.I4000.FastSG_K15.FW.sam \
-o long_reads.I4000.FastSG_K15.FW.bam \
-T schatzlab_coli/input/ecoli_Miseq_Assembly.fa
samtools view -bS long_reads.I4000.FastSG_K15.RV.sam \
-o long_reads.I4000.FastSG_K15.RV.bam \
-T schatzlab_coli/input/ecoli_Miseq_Assembly.fa

```

Then, we launched OPERA-LG software:

```

cd OPERA-LG_v2.0.6/bin
printf 'output_folder=results\n \
contig_file=schatzlab_coli/input/ecoli_Miseq_Assembly.fa\n \
filter_repeat=yes\nhaploid_coverage=50\n[LIB]\n \
map_file=fastsg/long_reads.I4000.FastSG_K15.sam' \
> opera.K15.ont_raw.conf
./OPERA-LG opera.K15.ont_raw.conf
mv results/scaffoldSeq.fasta schatzlab_coli/output/opera-lg.fa
cd bbmap
./rename.sh schatzlab_coli/output/opera-lg.fa out=out.fa
mv -f out.fa schatzlab_coli/output/opera-lg.fa

```

Then, we tested BOSS tool:

```

cd BOSS;
./boss schatzlab_coli/input/ecoli_Miseq_Assembly.fa \
fastsg/long_reads.I4000.FastSG_K15.FW.bam \
fastsg/long_reads.I4000.FastSG_K15.RV.bam \
75 4115 0.1 0.2 5 1 0 results;
mv results_ScaffoldSet.fa schatzlab_coli/output/boss.fa;

```

Then, we used ScaffMatch application:

```

cd ScaffMatch
./scaffmatch-0.9 -m -w results \
-c schatzlab_coli/input/ecoli_Miseq_Assembly.fa \
-1 fastsg/long_reads.I4000.FastSG_K15.FW.sam \
-2 fastsg/long_reads.I4000.FastSG_K15.RV.sam \
-i 4115 -p fr -s 400 -t 5
mv results/scaffolds.fa schatzlab_coli/output/scaffmatch.fa

```

Lastly, we used dnaasm-link tool:

```

cd dnaasm
./dnaasm -scaffold \
-contigs_file_path schatzlab_coli/input/ecoli_Miseq_Assembly.fa \
-long_reads_file_path \
schatzlab_coli/input/ecoli_ONT_Nanocorr_Corrected_reads.fa \
-min_contig_length 1
mv dnaasm/out schatzlab_coli/output/dnaasm.fa
cd bbmap
./rename.sh schatzlab_coli/output/dnaasm.fa out=out.fa
mv -f out.fa schatzlab_coli/output/dnaasm.fa

```

Finally, we evaluated resultant DNA sequences:

```
cd quast-4.1
./quast.py schatzlab_coli/input/ecoli_Miseq_Assembly.fa \
-R schatzlab_coli/ref.fa --scaffolds
./quast.py schatzlab_coli/output/sspace_longreads.fa \
-R schatzlab_coli/ref.fa --scaffolds
./quast.py schatzlab_coli/output/links.fa \
-R schatzlab_coli/ref.fa --scaffolds
./quast.py schatzlab_coli/output/opera-lg.fa \
-R schatzlab_coli/ref.fa --scaffolds
./quast.py schatzlab_coli/output/boss.fa \
-R schatzlab_coli/ref.fa --scaffolds
./quast.py schatzlab_coli/output/scaffmatch.fa \
-R schatzlab_coli/ref.fa --scaffolds
./quast.py schatzlab_coli/output/dnaasm.fa \
-R schatzlab_coli/ref.fa --scaffolds

./busco -f -c 16 -o a -i schatzlab_coli/input/ecoli_Miseq_Assembly.fa \
-l enterobacterales_odb9 -m genome
./busco -f -c 16 -o a -i schatzlab_coli/output/sspace_longreads.fa \
-l enterobacterales_odb9 -m genome
./busco -f -c 16 -o a -i schatzlab_coli/output/links.fa \
-l enterobacterales_odb9 -m genome
./busco -f -c 16 -o a -i schatzlab_coli/output/opera-lg.fa \
-l enterobacterales_odb9 -m genome
./busco -f -c 16 -o a -i schatzlab_coli/output/boss.fa \
-l enterobacterales_odb9 -m genome
./busco -f -c 16 -o a -i schatzlab_coli/output/scaffmatch.fa \
-l enterobacterales_odb9 -m genome
./busco -f -c 16 -o a -i schatzlab_coli/output/dnaasm.fa \
-l enterobacterales_odb9 -m genome
```

## 1.2 *Saccharomyces cerevisiae*

Firstly, we used SSPACE-LongRead tool:

```
cd SSPACE-LongRead_v1-1
perl SSPACE-LongRead.pl
-c schatzlab_yeast/input/W303_Miseq_Assembly.fa \
-p schatzlab_yeast/input/W303-ONT-Nanocorr-Corrected_independent_reads.fa \
-b results -k 1
mv SSPACE-LongRead_v1-1/results/scaffolds.fasta \
schatzlab_yeast/output/sspace_longreads.fa
```

Then, we tested LINKS application:

```
cd links_v1.8.5
echo 'schatzlab_yeast/input/W303-Nanocorr-Corrected_independent_reads.fa' \
> nano_reads
```

```
perl LINKS.pl -f schatzlab_yeast/input/W303_Miseq_Assembly.fa \
-s nano_reads -z 1
mv schatzlab_yeast/input/W303_Miseq_Assembly.fa.scaff*.fa \
schatzlab_yeast/output/links.fa
cd bbmap
./rename.sh schatzlab_yeast/output/links.fa out=out.fa
mv -f out.fa schatzlab_yeast/output/links.fa
```

After that, we generated set of short, paired DNA reads from long reads by Fast-SG:

```
cd fastsg/
echo 'long long_reads \
schatzlab_yeast/input/W303_Nanocorr_Corrected_independent_reads.fa 4000 1'
> schatzlab_yeast/reads.txt
./FAST-SG.pl -k 15 -l schatzlab_yeast/reads.txt \
-r schatzlab_yeast/input/W303_Miseq_Assembly.fa \
-p results
cd bbmap/
./splitsam.sh ../fastsg/long_reads.I4000.FastSG_K15.sam \
../fastsg/long_reads.I4000.FastSG_K15.FW.sam \
../fastsg/long_reads.I4000.FastSG_K15.RV.sam
cd fastsg/
samtools view -bS long_reads.I4000.FastSG_K15.FW.sam \
-o long_reads.I4000.FastSG_K15.FW.bam \
-T schatzlab_yeast/input/W303_Miseq_Assembly.fa
samtools view -bS long_reads.I4000.FastSG_K15.RV.sam \
-o long_reads.I4000.FastSG_K15.RV.bam \
-T schatzlab_yeast/input/W303_Miseq_Assembly.fa
```

Then, we launched OPERA-LG software:

```
cd OPERA-LG.v2.0.6/bin
printf 'output_folder=results\n \
contig_file=schatzlab_yeast/input/W303_Miseq_Assembly.fa\n \
filter_repeat=yes\nhaploid_coverage=50\n[LIB]\n \
map_file=fastsg/long_reads.I4000.FastSG_K15.sam' > opera.K15.ont_raw.conf
./OPERA-LG opera.K15.ont_raw.conf
mv results/scaffoldSeq.fasta schatzlab_yeast/output/opera-lg.fa
cd bbmap
./rename.sh schatzlab_yeast/output/opera-lg.fa out=out.fa
mv -f out.fa schatzlab_yeast/output/opera-lg.fa
```

Then, we tested BOSS tool:

```
cd BOSS;
./boss schatzlab_yeast/input/W303_Miseq_Assembly.fa \
fastsg/long_reads.I4000.FastSG_K15.FW.bam \
fastsg/long_reads.I4000.FastSG_K15.RV.bam \
75 4115 0.1 0.2 5 1 0 results;
mv results_ScaffoldSet.fasta schatzlab_yeast/output/boss.fa;
```

Then, we used ScaffMatch application:

```

cd ScaffMatch
./scaffmatch -0.9 -m -w results \
  -c schatzlab_yeast/input/W303_Miseq_Assembly.fa \
  -1 fastsg/long_reads.I4000.FastSG-K15.FW.sam \
  -2 fastsg/long_reads.I4000.FastSG-K15.RV.sam \
  -i 4115 -p fr -s 400
mv results/scaffolds.fa schatzlab_yeast/output/scaffmatch.fa

```

Lastly, we used dnaasm-link tool:

```

cd dnaasm
./dnaasm -scaffold -contigs_file_path \
  schatzlab_yeast/input/W303_Miseq_Assembly.fa -long_reads_file_path \
  schatzlab_yeast/input/W303_ONT_Nanocorr_Corrected_independent_reads.fa \
  -min_contig_length 1
mv dnaasm/out schatzlab_yeast/output/dnaasm.fa
cd bbmap
./rename.sh schatzlab_yeast/output/dnaasm.fa out=out.fa
mv -f out.fa schatzlab_yeast/output/dnaasm.fa

```

Finally, we evaluated resultant DNA sequences:

```

cd quast -4.1
./quast.py schatzlab_yeast/input/W303_Miseq_Assembly.fa \
  -R schatzlab_yeast/ref.fa --scaffolds
./quast.py schatzlab_yeast/output/sspace_longreads.fa \
  -R schatzlab_yeast/ref.fa --scaffolds
./quast.py schatzlab_yeast/output/links.fa \
  -R schatzlab_yeast/ref.fa --scaffolds
./quast.py schatzlab_yeast/output/opera-lg.fa \
  -R schatzlab_yeast/ref.fa --scaffolds
./quast.py schatzlab_yeast/output/boss.fa \
  -R schatzlab_yeast/ref.fa --scaffolds
./quast.py schatzlab_yeast/output/scaffmatch.fa \
  -R schatzlab_yeast/ref.fa --scaffolds
./quast.py schatzlab_yeast/output/dnaasm.fa \
  -R schatzlab_yeast/ref.fa --scaffolds

./busco -f -c 16 -o a -i schatzlab_yeast/input/W303_Miseq_Assembly.fa \
  -l saccharomycetales_odb9 -m genome
./busco -f -c 16 -o a -i schatzlab_yeast/output/sspace_longreads.fa \
  -l saccharomycetales_odb9 -m genome
./busco -f -c 16 -o a -i schatzlab_yeast/output/links.fa \
  -l saccharomycetales_odb9 -m genome
./busco -f -c 16 -o a -i schatzlab_yeast/output/opera-lg.fa \
  -l saccharomycetales_odb9 -m genome
./busco -f -c 16 -o a -i schatzlab_yeast/output/boss.fa \
  -l saccharomycetales_odb9 -m genome
./busco -f -c 16 -o a -i schatzlab_yeast/output/scaffmatch.fa \
  -l saccharomycetales_odb9 -m genome
./busco -f -c 16 -o a -i schatzlab_yeast/output/dnaasm.fa \

```

```
-l saccharomycetales_odb9 -m genome
```

## 2 The impact of adding long DNA reads

### 2.1 Mixing short and long reads - NA50 and number of contigs longer than 1 kbp

Firstly, we generated set of short reads by pIRS application:

```
cd pIRS_111
./pirs simulate -i ref.fa -e 0.01 -a 1 -o test -x 10 -m 400 -v 40
mv test_100_400_* 10_0/input/illumina/
```

Then, we generated set of long reads by NanoSim application:

```
cd NanoSim/src
./simulator.py linear -r ref.fa -c ecoli -o simulated -n 24250 \
  --min_len 1000 --max_len 10000
mv simulated_reads.fasta 10_10/input/nanopore
```

After that, we assembled set of short reads by ABySS tool and removed unitigs shorter than 1 kbp:

```
cd abyss
abyss-pe name=org k=55 in='10_0/input/illumina/test_100_400_1.fq.gz \
  10_0/input/illumina/test_100_400_2.fq.gz'
mv org-3.fa 10_0/output/abyssUnitigsFromPET.fa
cd 10_0/output/
python fastaLengthFilter.py abyssUnitigsFromPET.fa 1000 100000000 \
  abyssUnitigsFromPET_1000.fa
```

Lastly, we linked contigs by LINKS tool:

```
cd links_v1.8.5
echo '10_10/input/nanopore/simulated_reads.fasta' > nano_reads
perl LINKS.pl -f 10_0/output/abyssUnitigsFromPET_1000.fa \
  -s nano_reads -z 1 -l 0 -a 0.01
mv 10_0/output/abyssUnitigsFromPET_1000.fa.scaff_s_*.scaffolds.fa \
  10_10/output/links_from_unitigs_perfect_ont.fa
```

Finally, we evaluated resultant DNA sequences:

```
cd quast-4.1
./quast.py 10_10/output/links_from_unitigs_perfect_ont.fa \
  -R ref.fa --scaffolds
less quast_results/latest/report.txt
```

### 2.2 Mixing short and long reads - tandem repeats

#### 2.2.1 *Escherichia coli*

Firstly, we generated set of short reads by pIRS application:

```
cd pIRS_111
./pirs simulate -i Esc_col/ref.fa -e 0.01 -a 1 -o test -x 50 -m 400 -v 40
mv test_100_400_* Esc_col/input/illumina/
```



Then, we generated set of long reads by NanoSim application:

```
cd NanoSim/src
./simulator.py linear -r Esc_col/ref.fa -c ecoli -o simulated -n 18400 \
--min_len 1000 --max_len 10000 --perfect
mv simulated_reads.fasta Esc_col/input/nanopore
```

After that, we assembled set of short reads by ABySS tool and removed unitigs shorter than 1 kbp:

```
cd abyss
abyss-pe name=org k=55 in='Esc_col/input/illumina/test_100_400_1.fq.gz \
Esc_col/input/illumina/test_100_400_2.fq.gz'
mv org-3.fa Esc_col/output/abyssUnitigsFromPET.fa
cd Esc_col/output/
python fastaLengthFilter.py abyssUnitigsFromPET.fa 1000 100000000 \
abyssUnitigsFromPET_1000.fa
```

Then, we linked contigs by dnaasm-link tool without gap filling:

```
./dnaasm -scaffold \
-contigs_file_path Esc_col/output/abyssUnitigsFromPET_1000.fa \
-long_reads_file_path Esc_col/input/nanopore/simulated_reads.fasta \
-min_contig_length 0 -gapfilling 0 -min_reads 5 -min_lpr 5 -max_ratio 0.3\
-kmer_size 15 -min_links 5 -distance 1000 -step 1
mv out out_1000
./dnaasm -scaffold -contigs_file_path out_1000 \
-long_reads_file_path Esc_col/input/nanopore/simulated_reads.fasta \
-min_contig_length 0 -gapfilling 0 -min_reads 5 -min_lpr 5 -max_ratio 0.3\
-kmer_size 15 -min_links 5 -distance 2000 -step 1
mv out out_2000
./dnaasm -scaffold -contigs_file_path out_2000 \
-long_reads_file_path Esc_col/input/nanopore/simulated_reads.fasta \
-min_contig_length 0 -gapfilling 0 -min_reads 5 -min_lpr 5 -max_ratio 0.3\
-kmer_size 15 -min_links 5 -distance 3000 -step 1
mv out out_3000
./dnaasm -scaffold -contigs_file_path out_3000 \
-long_reads_file_path Esc_col/input/nanopore/simulated_reads.fasta \
-min_contig_length 0 -gapfilling 0 -min_reads 5 -min_lpr 5 -max_ratio 0.3\
-kmer_size 15 -min_links 5 -distance 4000 -step 1
mv out out_4000
./dnaasm -scaffold -contigs_file_path out_4000 \
-long_reads_file_path Esc_col/input/nanopore/simulated_reads.fasta \
-min_contig_length 0 -gapfilling 0 -min_reads 5 -min_lpr 5 -max_ratio 0.3\
-kmer_size 15 -min_links 5 -distance 5000 -step 1
mv out out_5000
./dnaasm -scaffold -contigs_file_path out_5000 \
-long_reads_file_path Esc_col/input/nanopore/simulated_reads.fasta \
-min_contig_length 0 -gapfilling 0 -min_reads 5 -min_lpr 5 -max_ratio 0.3\
-kmer_size 15 -min_links 5 -distance 6000 -step 1
mv out out_6000
```

```

./dnaasm -scaffold -contigs_file_path out_6000 \
  -long_reads_file_path Esc_col/input/nanopore/simulated_reads.fasta \
  -min_contig_length 0 -gapfilling 0 -min_reads 5 -min_lpr 5 -max_ratio 0.3\
  -kmer_size 15 -min_links 5 -distance 7000 -step 1
mv out out_7000
./dnaasm -scaffold -contigs_file_path out_7000 \
  -long_reads_file_path Esc_col/input/nanopore/simulated_reads.fasta \
  -min_contig_length 0 -gapfilling 0 -min_reads 5 -min_lpr 5 -max_ratio 0.3\
  -kmer_size 15 -min_links 5 -distance 8000 -step 1
mv out out_8000
./dnaasm -scaffold -contigs_file_path out_8000 \
  -long_reads_file_path Esc_col/input/nanopore/simulated_reads.fasta \
  -min_contig_length 0 -gapfilling 0 -min_reads 5 -min_lpr 5 -max_ratio 0.3\
  -kmer_size 15 -min_links 5 -distance 9000 -step 1
mv out out_9000
./dnaasm -scaffold -contigs_file_path out_9000 \
  -long_reads_file_path Esc_col/input/nanopore/simulated_reads.fasta \
  -min_contig_length 0 -gapfilling 0 -min_reads 5 -min_lpr 5 -max_ratio 0.3\
  -kmer_size 15 -min_links 5 -distance 10000 -step 1
bbmap/rename.sh in=out out=out.fa
mv out.fa Esc_col/output/dnaasm-without-gapfilling-from-unitigs.fa

```

Then, we linked contigs by dnaasm-link tool with gap filling:

```

./dnaasm -scaffold \
  -contigs_file_path Esc_col/output/abyssUnitigsFromPET_1000.fa \
  -long_reads_file_path Esc_col/input/nanopore/simulated_reads.fasta \
  -min_contig_length 0 -gapfilling 1 -min_reads 5 -min_lpr 5 -max_ratio 0.3\
  -kmer_size 15 -min_links 5 -distance 1000 -step 1
mv out out_1000
./dnaasm -scaffold -contigs_file_path out_1000 \
  -long_reads_file_path Esc_col/input/nanopore/simulated_reads.fasta \
  -min_contig_length 0 -gapfilling 1 -min_reads 5 -min_lpr 5 -max_ratio 0.3\
  -kmer_size 15 -min_links 5 -distance 2000 -step 1
mv out out_2000
./dnaasm -scaffold -contigs_file_path out_2000 \
  -long_reads_file_path Esc_col/input/nanopore/simulated_reads.fasta \
  -min_contig_length 0 -gapfilling 1 -min_reads 5 -min_lpr 5 -max_ratio 0.3\
  -kmer_size 15 -min_links 5 -distance 3000 -step 1
mv out out_3000
./dnaasm -scaffold -contigs_file_path out_3000 \
  -long_reads_file_path Esc_col/input/nanopore/simulated_reads.fasta \
  -min_contig_length 0 -gapfilling 1 -min_reads 5 -min_lpr 5 -max_ratio 0.3\
  -kmer_size 15 -min_links 5 -distance 4000 -step 1
mv out out_4000
./dnaasm -scaffold -contigs_file_path out_4000 \
  -long_reads_file_path Esc_col/input/nanopore/simulated_reads.fasta \
  -min_contig_length 0 -gapfilling 1 -min_reads 5 -min_lpr 5 -max_ratio 0.3\
  -kmer_size 15 -min_links 5 -distance 5000 -step 1
mv out out_5000

```

```

./dnaasm -scaffold -contigs_file_path out_5000 \
  -long_reads_file_path Esc_col/input/nanopore/simulated_reads.fasta \
  -min_contig_length 0 -gapfilling 1 -min_reads 5 -min_lpr 5 -max_ratio 0.3\
  -kmer_size 15 -min_links 5 -distance 6000 -step 1
mv out out_6000
./dnaasm -scaffold -contigs_file_path out_6000 \
  -long_reads_file_path Esc_col/input/nanopore/simulated_reads.fasta \
  -min_contig_length 0 -gapfilling 1 -min_reads 5 -min_lpr 5 -max_ratio 0.3\
  -kmer_size 15 -min_links 5 -distance 7000 -step 1
mv out out_7000
./dnaasm -scaffold -contigs_file_path out_7000 \
  -long_reads_file_path Esc_col/input/nanopore/simulated_reads.fasta \
  -min_contig_length 0 -gapfilling 1 -min_reads 5 -min_lpr 5 -max_ratio 0.3\
  -kmer_size 15 -min_links 5 -distance 8000 -step 1
mv out out_8000
./dnaasm -scaffold -contigs_file_path out_8000 \
  -long_reads_file_path Esc_col/input/nanopore/simulated_reads.fasta \
  -min_contig_length 0 -gapfilling 1 -min_reads 5 -min_lpr 5 -max_ratio 0.3\
  -kmer_size 15 -min_links 5 -distance 9000 -step 1
mv out out_9000
./dnaasm -scaffold -contigs_file_path out_9000 \
  -long_reads_file_path Esc_col/input/nanopore/simulated_reads.fasta \
  -min_contig_length 0 -gapfilling 1 -min_reads 5 -min_lpr 5 -max_ratio 0.3\
  -kmer_size 15 -min_links 5 -distance 10000 -step 1
bbmap/rename.sh in=out out=out.fa
mv out.fa Esc_col/output/dnaasm_with_gapfilling_from_unitigs.fa

```

Then, we filled gaps by GapFiller, Sealer and SOAPdenovo2 GapCloser tools:

```

cd GapFiller_v1-10_linux-x86_64
printf "lib_1_lbwa_Esc_col/input/illumina/test_100_400_1.fq.gz \
  _Esc_col/input/illumina/test_100_400_2.fq.gz_400_0.01_FR" \
  > reads.txt
perl GapFiller.pl -l reads.txt \
  -s Esc_col/output/dnaasm_without_gapfilling_from_unitigs.fa -T 16
cp standard_output/standard_output.gapfilled.final.fa \
  Esc_col/output/dnaasm_without_gapfilling_from_unitigs_gapfiller.fa

abyss-sealer -k55 -o test \
  -S Esc_col/output/dnaasm_without_gapfilling_from_unitigs.fa \
  Esc_col/input/illumina/test_100_400_1.fq.gz \
  Esc_col/input/illumina/test_100_400_2.fq.gz
cp test_scaffold.fa \
  Esc_col/output/dnaasm_without_gapfilling_from_unitigs_sealer.fa

cd /tmp
printf "max_rd_len=100\n[LIB]\navg_ins=400\nreverse_seq=0\nasm_flags=3\n\
  _rd_len_cutoff=100\nrank=1\npair_num_cutoff=3\nmap_len=32\n\
  _q1=Esc_col/input/illumina/test_100_400_1.fq.gz\n\
  _q2=Esc_col/input/illumina/test_100_400_2.fq.gz" > reads.txt

```

```
GapCloser -a Esc_col/output/dnaasm_without_gapfilling_from_unitigs.fa \
-b reads.txt -o results.fa -t 16
cp results.fa \
Esc_col/output/dnaasm_without_gapfilling_from_unitigs_gapcloser.fa
```

Finally, we evaluated resultant DNA sequences in terms of tandem repeats occurrence:

```
./trf409 Esc_col/ref.fa 1 100 100 80 10 250 2000 -l 6
./trf409 Esc_col/output/abyssUnitigsFromPET_1000.fa \
1 100 100 80 10 250 2000 -l 6
./trf409 Esc_col/output/dnaasm_without_gapfilling_from_unitigs.fa \
1 100 100 80 10 250 2000 -l 6
./trf409 Esc_col/output/dnaasm_with_gapfilling_from_unitigs.fa \
1 100 100 80 10 250 2000 -l 6
./trf409 Esc_col/output/dnaasm_without_gapfilling_from_unitigs_gapcloser.fa \
1 100 100 80 10 250 2000 -l 6
./trf409 Esc_col/output/dnaasm_without_gapfilling_from_unitigs_sealer.fa \
1 100 100 80 10 250 2000 -l 6
./trf409 Esc_col/output/dnaasm_without_gapfilling_from_unitigs_gapfiller.fa \
1 100 100 80 10 250 2000 -l 6
```

### 2.2.2 *Saccharomyces cerevisiae*

Firstly, we generated set of short reads by pIRS application:

```
cd pIRS_111
./pirs simulate -i Sac_cer/ref.fa -e 0.01 -a 1 -o test -x 50 -m 400 -v 40
mv test_100_400_* Sac_cer/input/illumina/
```

Then, we generated set of long reads by NanoSim application:

```
cd NanoSim/src
./simulator.py linear -r Sac_cer/ref.fa -c ecoli -o simulated -n 48500 \
--min_len 1000 --max_len 10000 --perfect
mv simulated_reads.fasta Sac_cer/input/nanopore
```

After that, we assembled set of short reads by ABySS tool and removed unitigs shorter than 1 kbp:

```
cd abyss
abyss-pe name=org k=55 in='Sac_cer/input/illumina/test_100_400_1.fq.gz \
Sac_cer/input/illumina/test_100_400_2.fq.gz'
mv org-3.fa Sac_cer/output/abyssUnitigsFromPET.fa
cd Sac_cer/output/
python fastaLengthFilter.py abyssUnitigsFromPET.fa 1000 100000000 \
abyssUnitigsFromPET_1000.fa
```

Then, we linked contigs by dnaasm-link tool without gap filling:

```
./dnaasm -scaffold \
-contigs_file_path Sac_cer/output/abyssUnitigsFromPET_1000.fa \
-long_reads_file_path Sac_cer/input/nanopore/simulated_reads.fasta \
-min_contig_length 0 -gapfilling 0 -min_reads 5 -min_lpr 5 -max_ratio 0.3\
```

```

-kmer_size 15 -min_links 5 -distance 1000 -step 1
mv out out_1000
./dnaasm -scaffold -contigs_file_path out_1000 \
-long_reads_file_path Sac_cer/input/nanopore/simulated_reads.fasta \
-min_contig_length 0 -gapfilling 0 -min_reads 5 -min_lpr 5 -max_ratio 0.3\
-kmer_size 15 -min_links 5 -distance 2000 -step 1
mv out out_2000
./dnaasm -scaffold -contigs_file_path out_2000 \
-long_reads_file_path Sac_cer/input/nanopore/simulated_reads.fasta \
-min_contig_length 0 -gapfilling 0 -min_reads 5 -min_lpr 5 -max_ratio 0.3\
-kmer_size 15 -min_links 5 -distance 3000 -step 1
mv out out_3000
./dnaasm -scaffold -contigs_file_path out_3000 \
-long_reads_file_path Sac_cer/input/nanopore/simulated_reads.fasta \
-min_contig_length 0 -gapfilling 0 -min_reads 5 -min_lpr 5 -max_ratio 0.3\
-kmer_size 15 -min_links 5 -distance 4000 -step 1
mv out out_4000
./dnaasm -scaffold -contigs_file_path out_4000 \
-long_reads_file_path Sac_cer/input/nanopore/simulated_reads.fasta \
-min_contig_length 0 -gapfilling 0 -min_reads 5 -min_lpr 5 -max_ratio 0.3\
-kmer_size 15 -min_links 5 -distance 5000 -step 1
mv out out_5000
./dnaasm -scaffold -contigs_file_path out_5000 \
-long_reads_file_path Sac_cer/input/nanopore/simulated_reads.fasta \
-min_contig_length 0 -gapfilling 0 -min_reads 5 -min_lpr 5 -max_ratio 0.3\
-kmer_size 15 -min_links 5 -distance 6000 -step 1
mv out out_6000
./dnaasm -scaffold -contigs_file_path out_6000 \
-long_reads_file_path Sac_cer/input/nanopore/simulated_reads.fasta \
-min_contig_length 0 -gapfilling 0 -min_reads 5 -min_lpr 5 -max_ratio 0.3\
-kmer_size 15 -min_links 5 -distance 7000 -step 1
mv out out_7000
./dnaasm -scaffold -contigs_file_path out_7000 \
-long_reads_file_path Sac_cer/input/nanopore/simulated_reads.fasta \
-min_contig_length 0 -gapfilling 0 -min_reads 5 -min_lpr 5 -max_ratio 0.3\
-kmer_size 15 -min_links 5 -distance 8000 -step 1
mv out out_8000
./dnaasm -scaffold -contigs_file_path out_8000 \
-long_reads_file_path Sac_cer/input/nanopore/simulated_reads.fasta \
-min_contig_length 0 -gapfilling 0 -min_reads 5 -min_lpr 5 -max_ratio 0.3\
-kmer_size 15 -min_links 5 -distance 9000 -step 1
mv out out_9000
./dnaasm -scaffold -contigs_file_path out_9000 \
-long_reads_file_path Sac_cer/input/nanopore/simulated_reads.fasta \
-min_contig_length 0 -gapfilling 0 -min_reads 5 -min_lpr 5 -max_ratio 0.3\
-kmer_size 15 -min_links 5 -distance 10000 -step 1
bmap/rename.sh in=out out=out.fa
mv out.fa Sac_cer/output/dnaasm_without_gapfilling_from_unitigs.fa

```

Then, we linked contigs by dnaasm-link tool with gap filling:

```
./dnaasm -scaffold \  
-contigs_file_path Sac_cer/output/abyssUnitigsFromPET_1000.fa \  
-long_reads_file_path Sac_cer/input/nanopore/simulated_reads.fasta \  
-min_contig_length 0 -gapfilling 1 -min_reads 5 -min_lpr 5 -max_ratio 0.3\  
-kmer_size 15 -min_links 5 -distance 1000 -step 1  
mv out out_1000  
./dnaasm -scaffold -contigs_file_path out_1000 \  
-long_reads_file_path Sac_cer/input/nanopore/simulated_reads.fasta \  
-min_contig_length 0 -gapfilling 1 -min_reads 5 -min_lpr 5 -max_ratio 0.3\  
-kmer_size 15 -min_links 5 -distance 2000 -step 1  
mv out out_2000  
./dnaasm -scaffold -contigs_file_path out_2000 \  
-long_reads_file_path Sac_cer/input/nanopore/simulated_reads.fasta \  
-min_contig_length 0 -gapfilling 1 -min_reads 5 -min_lpr 5 -max_ratio 0.3\  
-kmer_size 15 -min_links 5 -distance 3000 -step 1  
mv out out_3000  
./dnaasm -scaffold -contigs_file_path out_3000 \  
-long_reads_file_path Sac_cer/input/nanopore/simulated_reads.fasta \  
-min_contig_length 0 -gapfilling 1 -min_reads 5 -min_lpr 5 -max_ratio 0.3\  
-kmer_size 15 -min_links 5 -distance 4000 -step 1  
mv out out_4000  
./dnaasm -scaffold -contigs_file_path out_4000 \  
-long_reads_file_path Sac_cer/input/nanopore/simulated_reads.fasta \  
-min_contig_length 0 -gapfilling 1 -min_reads 5 -min_lpr 5 -max_ratio 0.3\  
-kmer_size 15 -min_links 5 -distance 5000 -step 1  
mv out out_5000  
./dnaasm -scaffold -contigs_file_path out_5000 \  
-long_reads_file_path Sac_cer/input/nanopore/simulated_reads.fasta \  
-min_contig_length 0 -gapfilling 1 -min_reads 5 -min_lpr 5 -max_ratio 0.3\  
-kmer_size 15 -min_links 5 -distance 6000 -step 1  
mv out out_6000  
./dnaasm -scaffold -contigs_file_path out_6000 \  
-long_reads_file_path Sac_cer/input/nanopore/simulated_reads.fasta \  
-min_contig_length 0 -gapfilling 1 -min_reads 5 -min_lpr 5 -max_ratio 0.3\  
-kmer_size 15 -min_links 5 -distance 7000 -step 1  
mv out out_7000  
./dnaasm -scaffold -contigs_file_path out_7000 \  
-long_reads_file_path Sac_cer/input/nanopore/simulated_reads.fasta \  
-min_contig_length 0 -gapfilling 1 -min_reads 5 -min_lpr 5 -max_ratio 0.3\  
-kmer_size 15 -min_links 5 -distance 8000 -step 1  
mv out out_8000  
./dnaasm -scaffold -contigs_file_path out_8000 \  
-long_reads_file_path Sac_cer/input/nanopore/simulated_reads.fasta \  
-min_contig_length 0 -gapfilling 1 -min_reads 5 -min_lpr 5 -max_ratio 0.3\  
-kmer_size 15 -min_links 5 -distance 9000 -step 1  
mv out out_9000  
./dnaasm -scaffold -contigs_file_path out_9000 \  

```

```

-long_reads_file_path Sac_cer/input/nanopore/simulated_reads.fasta \
-min_contig_length 0 -gapfilling 1 -min_reads 5 -min_lpr 5 -max_ratio 0.3 \
-kmer_size 15 -min_links 5 -distance 10000 -step 1
bmap/rename.sh in=out out=out.fa
mv out.fa Sac_cer/output/dnaasm-with-gapfilling-from-unitigs.fa

```

Then, we filled gaps by GapFiller, Sealer and SOAPdenovo2 GapCloser tools:

```

cd GapFiller_v1-10_linux-x86_64
printf "lib_1_lbwa_Sac_cer/input/illumina/test_100_400_1.fq.gz \
Sac_cer/input/illumina/test_100_400_2.fq.gz_400_0.01_FR" \
> reads.txt
perl GapFiller.pl -l reads.txt \
-s Sac_cer/output/dnaasm-without-gapfilling-from-unitigs.fa -T 16
cp standard_output/standard_output_gapfilled.final.fa \
Sac_cer/output/dnaasm-without-gapfilling-from-unitigs-gapfiller.fa

abyss-sealer -k55 -o test \
-S Sac_cer/output/dnaasm-without-gapfilling-from-unitigs.fa \
Sac_cer/input/illumina/test_100_400_1.fq.gz \
Sac_cer/input/illumina/test_100_400_2.fq.gz
cp test_scaffold.fa \
Sac_cer/output/dnaasm-without-gapfilling-from-unitigs-sealer.fa

cd /tmp
printf "max_rd_len=100\n[LIB]\navg_ins=400\nreverse_seq=0\nasm_flags=3\n\
rd_len_cutoff=100\nrank=1\npair_num_cutoff=3\nmap_len=32\n\
q1=Sac_cer/input/illumina/test_100_400_1.fq.gz\n\
q2=Sac_cer/input/illumina/test_100_400_2.fq.gz" > reads.txt
GapCloser -a Sac_cer/output/dnaasm-without-gapfilling-from-unitigs.fa \
-b reads.txt -o results.fa -t 16
cp results.fa \
Sac_cer/output/dnaasm-without-gapfilling-from-unitigs-gapcloser.fa

```

Finally, we evaluated resultant DNA sequences in terms of tandem repeats occurrence:

```

./trf409 Sac_cer/ref.fa 1 100 100 80 10 250 2000 -l 6
./trf409 Sac_cer/output/abyssUnitigsFromPET_1000.fa \
1 100 100 80 10 250 2000 -l 6
./trf409 Sac_cer/output/dnaasm-without-gapfilling-from-unitigs.fa \
1 100 100 80 10 250 2000 -l 6
./trf409 Sac_cer/output/dnaasm-with-gapfilling-from-unitigs.fa \
1 100 100 80 10 250 2000 -l 6
./trf409 Sac_cer/output/dnaasm-without-gapfilling-from-unitigs-gapcloser.fa \
1 100 100 80 10 250 2000 -l 6
./trf409 Sac_cer/output/dnaasm-without-gapfilling-from-unitigs-sealer.fa \
1 100 100 80 10 250 2000 -l 6
./trf409 Sac_cer/output/dnaasm-without-gapfilling-from-unitigs-gapfiller.fa \
1 100 100 80 10 250 2000 -l 6

```

### 3 Time and memory usage

Firstly, we trimmed *Caenorhabditis elegans* reference genome to first 1 Mbp:

```
cd time_eval/1M
head -c 1000000 ../ref.fa > ref.fa
```

Then, we generated set of short reads by pIRS application:

```
cd pIRS_111
./pirs simulate -i time_eval/1M/ref.fa -e 0.01 -a 1 -o test \
  -x 30 -m 400 -v 40
mv test_100_400_* time_eval/1M/input/illumina/
```

After that, we assembled set of short reads by ABySS tool and removed scaffolds shorter than 1 kbp:

```
cd abyss
abyss-pe name=org k=55 \
  in='time_eval/1M/input/illumina/test_100_400_1.fq.gz \
    time_eval/1M/input/illumina/test_100_400_2.fq.gz'
mv org-8.fa time_eval/1M/output/abyssScaffoldsFromPET.fa
cd time_eval/1M/output
python fastaLengthFilter.py abyssScaffoldsFromPET.fa 1000 100000000 \
  abyssScaffoldsFromPET_1000.fa
```

Then, we generated set of long reads by NanoSim application:

```
cd NanoSim/src
./simulator.py linear -r time_eval/1M/ref.fa -c ecoli -o simulated \
  -n 2000 --min_len 1000 --max_len 10000
mv sim_reads.fasta time_eval/1M/input/nanopore/sim_reads_10x.fasta
```

Lastly, we linked contigs by LINKS, SSPACE-LongRead and dnaasm-link tools:

```
cd links_v1.8.5
echo 'time_eval/1M/input/nanopore/sim_reads_10x.fasta' > nano_reads
perl LINKS.pl -f time_eval/1M/output/abyssScaffoldsFromPET_1000.fa
  -s nano_reads -z 1

cd SSPACE-LongRead_v1-1
perl SSPACE-LongRead.pl
  -c time_eval/1M/output/abyssScaffoldsFromPET_1000.fa
  -p time_eval/1M/input/nanopore/sim_reads_10x.fasta -b results -k 1

cd /home/wkusmir/dnaasm
export LD_LIBRARY_PATH=lib
./dnaasm -scaffold
  -contigs_file_path time_eval/1M/output/abyssScaffoldsFromPET_1000.fa
  -long_reads_file_path time_eval/1M/input/nanopore/sim_reads_10x.fasta
  -min_contig_length 0 -gapfilling 0
```
